# Supplementary material
Source: publisher figshare collection journal article supplement (https://gsapubs.figshare.com/ndownloader/files/22743152)
Supplement: Supplementary file 1 [file 22743152]

Figure A: Concordia diagrams. Ellipses and errors reflect 2 sigma errors. POF = probability of fit (see Methods for discussion).

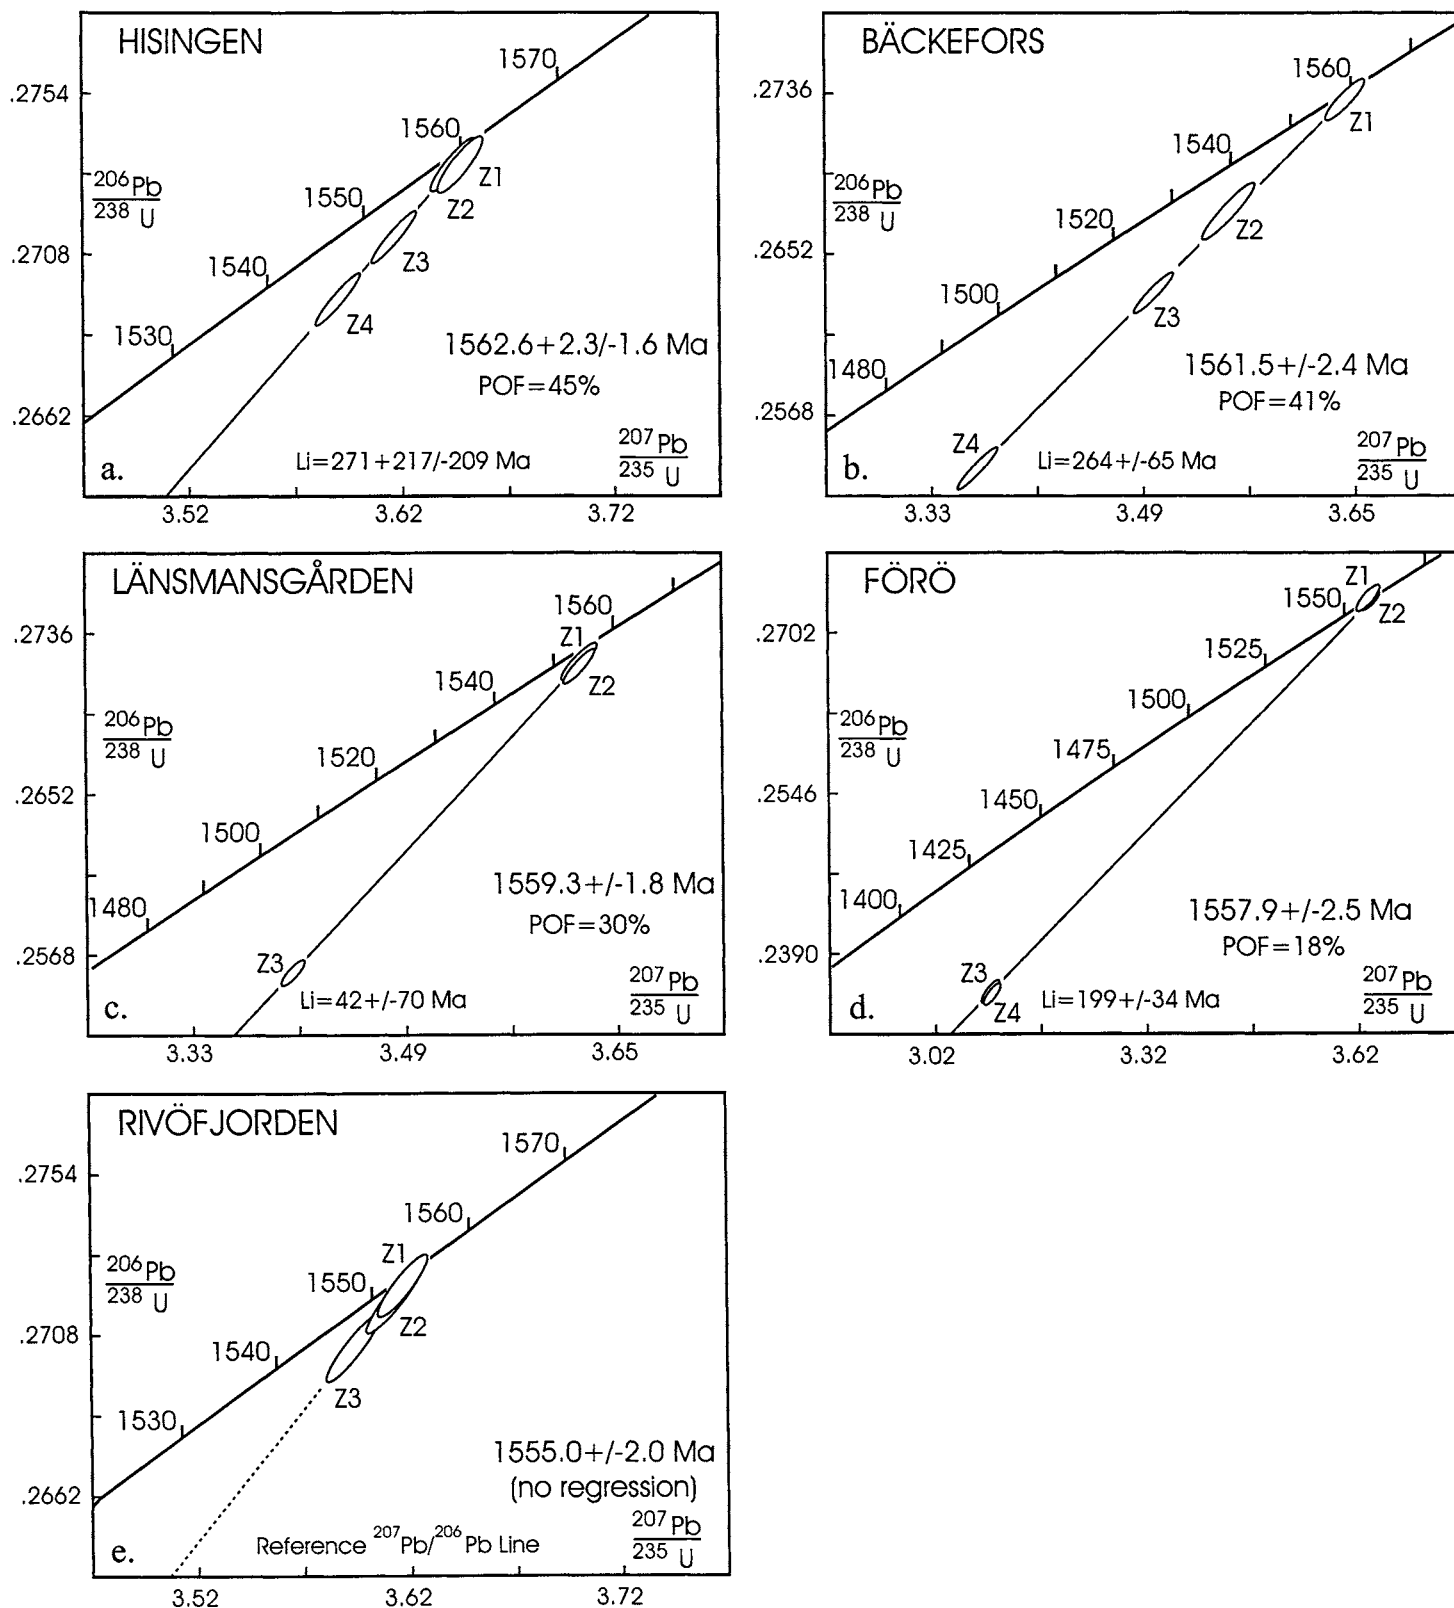

Table A. U-Pb results.

| Fraction                  | Weight<br>[mg] | Concentration |                 | Measured             |                   | *Corrected Atomic Ratios |                   |                   |                   |                   |                   |                   | Ages [Ma]         |      |      |  |
|---------------------------|----------------|---------------|-----------------|----------------------|-------------------|--------------------------|-------------------|-------------------|-------------------|-------------------|-------------------|-------------------|-------------------|------|------|--|
|                           |                | U             | Pb <sup>R</sup> | Common               | <sup>206</sup> Pb | <sup>208</sup> Pb        | <sup>206</sup> Pb | <sup>207</sup> Pb | <sup>207</sup> Pb | <sup>206</sup> Pb | <sup>206</sup> Pb | <sup>207</sup> Pb | <sup>207</sup> Pb |      |      |  |
|                           |                | [ppm]         |                 | Pb <sup>T</sup> [pg] | <sup>204</sup> Pb | <sup>206</sup> Pb        | <sup>238</sup> U  | <sup>235</sup> U  | <sup>206</sup> Pb | <sup>238</sup> U  | <sup>235</sup> U  | <sup>206</sup> Pb |                   |      |      |  |
| HISINGEN GRANITE          |                |               |                 |                      |                   |                          |                   |                   |                   |                   |                   |                   |                   |      |      |  |
| Z1 35 sm clr clrsls euh   | 0.035          | 139           | 41.1            | 4                    | 22639             | 0.1641                   | 0.27335           | 66                | 3.6475            | 86                | 0.09678           | 12                | 1558              | 1560 | 1563 |  |
| Z2 clr clrsls euh elong   | 0.030          | 133           | 39.2            | 7                    | 10136             | 0.1579                   | 0.27335           | 62                | 3.6441            | 86                | 0.09669           | 10                | 1558              | 1559 | 1561 |  |
| Z3 sm clr clrsls euh prsm | 0.057          | 135           | 39.5            | 6                    | 23280             | 0.1554                   | 0.27128           | 62                | 3.6163            | 86                | 0.09668           | 8                 | 1547              | 1553 | 1561 |  |
| Z4 sm clr clrsls euh prsm | 0.042          | 136           | 39.2            | 2                    | 39674             | 0.1508                   | 0.26951           | 60                | 3.5899            | 86                | 0.09661           | 8                 | 1538              | 1547 | 1560 |  |
| LÄNSMANSGÅRDEN GRANITE    |                |               |                 |                      |                   |                          |                   |                   |                   |                   |                   |                   |                   |      |      |  |
| Z1 euh elong-need clr     | 0.022          | 142           | 41.7            | 32                   | 1694              | 0.1547                   | 0.27209           | 80                | 3.6215            | 110               | 0.09653           | 14                | 1551              | 1554 | 1558 |  |
| Z2 2:1-3:1 clr euh prsm   | 0.033          | 159           | 46.2            | 3                    | 29245             | 0.1485                   | 0.27184           | 74                | 3.6215            | 98                | 0.09662           | 12                | 1550              | 1554 | 1560 |  |
| Z3 med elong crk sub      | 0.043          | 167           | 46.4            | 7                    | 15439             | 0.1635                   | 0.25587           | 54                | 3.4048            | 72                | 0.09651           | 12                | 1469              | 1505 | 1558 |  |
| FÖRÖ DYKE                 |                |               |                 |                      |                   |                          |                   |                   |                   |                   |                   |                   |                   |      |      |  |
| Z1 2 med clr pink         | 0.006          | 109           | 32.1            | 3                    | 4255              | 0.1493                   | 0.27355           | 106               | 3.6361            | 136               | 0.09640           | 22                | 1559              | 1557 | 1556 |  |
| Z2 single pink            | 0.018          | 65            | 19.8            | 6                    | 3438              | 0.1924                   | 0.27326           | 76                | 3.6391            | 110               | 0.09658           | 16                | 1557              | 1558 | 1559 |  |
| Z3 vsm euh need           | 0.007          | 514           | 130.4           | 6                    | 8260              | 0.1582                   | 0.23530           | 90                | 3.0977            | 106               | 0.09548           | 20                | 1362              | 1432 | 1538 |  |
| Z4 b vsm need clr euh     | 0.005          | 473           | 120.0           | 4                    | 7962              | 0.1586                   | 0.23505           | 86                | 3.1001            | 98                | 0.09566           | 20                | 1361              | 1433 | 1541 |  |
| RIVÖFJORD GABBRO          |                |               |                 |                      |                   |                          |                   |                   |                   |                   |                   |                   |                   |      |      |  |
| Z1 clr blocky euh frags   | 0.042          | 182           | 52.9            | 18                   | 7190              | 0.1451                   | 0.27221           | 72                | 3.6165            | 96                | 0.09636           | 12                | 1552              | 1553 | 1555 |  |
| Z2 5 med clr lt bge ang   | 0.038          | 112           | 31.9            | 3                    | 21454             | 0.1195                   | 0.27187           | 84                | 3.6130            | 110               | 0.09638           | 12                | 1550              | 1552 | 1555 |  |
| Z3 2 lg clr lt bge ang    | 0.038          | 158           | 45.2            | 11                   | 9473              | 0.1368                   | 0.27043           | 78                | 3.5932            | 104               | 0.09637           | 10                | 1543              | 1548 | 1555 |  |
| BÄCKEFORS GRANITE         |                |               |                 |                      |                   |                          |                   |                   |                   |                   |                   |                   |                   |      |      |  |
| Z1 b lg-med elong need    | 0.003          | 226           | 67.5            | 2                    | 5326              | 0.1739                   | 0.27326           | 88                | 3.6433            | 122               | 0.09670           | 14                | 1557              | 1559 | 1561 |  |
| Z2 clr amber xls          | 0.011          | 384           | 112.0           | 3                    | 22372             | 0.1715                   | 0.26768           | 122               | 3.5583            | 162               | 0.09641           | 16                | 1529              | 1540 | 1556 |  |
| Z3 med ang xls            | 0.028          | 491           | 143.1           | 10                   | 23165             | 0.1886                   | 0.26340           | 86                | 3.5012            | 122               | 0.09641           | 12                | 1507              | 1527 | 1556 |  |
| Z4 lg-med elong-need      | 0.041          | 490           | 139.5           | 10                   | 30585             | 0.2053                   | 0.25427           | 88                | 3.3674            | 124               | 0.09605           | 10                | 1460              | 1497 | 1549 |  |

All analyses are single and multigrain zircon fractions. Pb<sup>R</sup>= Radiogenic Pb; Pb<sup>T</sup>= Total Common Pb

Abbreviations are: ang= angular; b=best; bge=beige; clr=clear; clrsls=colourless; crk=cracked; elong=elongate; euh=euhedral; frags=fragments; lg=large; lt=light; med=medium size (75-100µm); need=needles; prsm=prisms; sm=small size (50-75µm); sub=subhedral; vsm=very small size (<50 µm); xls=crystals.

\*Ratios corrected for fractionation, 1 pg and .25 pg laboratory Pb and U blanks respectively and initial common Pb calculated using Pb isotopic compositions of Stacey and Kramers (1975). All fractions extensively abraded. Two-sigma uncertainties on isotopic ratios are reported after the ratios and refer to the final digits.

## **Appendix A: Methods**

Rock samples were processed at The University of Texas at Austin. They were crushed to mineral size under clean conditions using a jaw crusher, disc pulverizer and initial mineral separation used a Wilfley™ table. Heavy mineral components were processed further using sieves, heavy liquids and a Frantz™ magnetic separator. Mineral fractions were characterised using a binocular reflected-light microscope, transmitted light petrographic microscope (with condenser lens inserted to minimise edge refraction) and a scanning cathodoluminescence (CL) imaging system on a JEOL 730 scanning electron microscope.

Multiple or single grains of each population were selected for analysis on the basis of optical properties to ensure that only the highest quality grains were analysed. All mineral fractions analysed were strongly abraded (Krogh 1982), subsequently re-evaluated optically and then washed successively in distilled 4N nitric acid, water and acetone. They were loaded dry into Teflon™ capsules with a mixed  $^{205}\text{Pb}/^{235}\text{U}$  isotopic tracer solution and dissolved with HF and  $\text{HNO}_3$ . Chemical separation of U and Pb from zircon using minicolumns (0.055 ml resin volume; after Krogh 1973) resulted in total procedural blanks of 1 and .25 pg for Pb and U, respectively. Pb and U were loaded together with silica gel and phosphoric acid onto an outgassed filament of zone-refined rhenium ribbon and analysed on a multi-collector MAT 261 thermal ionization mass spectrometer, either operating in static mode (with  $^{204}\text{Pb}$  measured in the axial secondary electron multiplier (SEM) - ion counting system) or dynamic mode with all masses measured sequentially by the SEM - ion counting system. Initial common Pb was corrected for using Stacey and Kramers (1975) and ages were calculated using decay constants of Jaffey et al. (1971). Errors on isotopic ratios were calculated by propagating uncertainties in measurement of isotopic ratios, fractionation and amount of blank with a program written by J.N. Connelly. Results are reported in Table 1 with  $2\sigma$  errors. Linear regressions were performed using the procedure of Davis (1982). The goodness of fit of a regressed line is represented as a probability of fit, where 10% or better is considered acceptable and corresponds to a Mean Square of Weighted Deviates (MSWD) of 2 or less. Ages listed in the text, table and figures are quoted with  $2\sigma$  errors.

## **References Cited in Methods**

- Davis, D.W., 1982, Optimum linear regression and error estimation applied to U-Pb data: Canadian Journal of Earth Sciences, v. 23, p. 2141-2149.
- Jaffey, A.H., Flynn, K.F., Glendenin, L.E. Bentley, W.C., and Essling, A.M., 1971, Precision measurements of half-lives and specific activities of  $^{238}\text{U}$  and  $^{235}\text{U}$ : Physical Reviews, v. 4, p. 1889-1906.
- Krogh, T.E., 1973, A low-contamination method for hydrothermal decomposition of zircon and extraction of U and Pb for isotopic age determination: Geochimica Cosmochimica Acta, v. 37, p. 485-494.
- Krogh, T.E., 1982, Improved accuracy of U-Pb zircon ages by the creation of more concordant systems using an abrasion technique: Geochimica Cosmochimica Acta, v. 46, p. 637-649.
- Stacey, J.C. and Kramers, J.D., 1975, Approximation of terrestrial lead isotope evolution by a two-stage model: Earth and Planetary Science Letters, v. 26, p. 207-221.
